# Supplementary material for: Captivity and Infection by the Fungal Pathogen Batrachochytrium salamandrivorans Perturb the Amphibian Skin Microbiome
Source: PubMed Central journal article supplement (PMC6716147; doi:10.3389/fmicb.2019.01834), 2019-08-23
Supplement: Data_Sheet_1.pdf [file Data_Sheet_1.pdf]

## ***Supplementary Material***

### **1 SUPPLEMENTARY DATA**

**Data S1.** Wild-captive indicator analysis for *T. cristatus*.

**Data S2.** Wild-captive indicator analysis for *L. vulgaris*.

## 2 SUPPLEMENTARY TABLES AND FIGURES

### 2.1 Tables

|                           | <b>Kingdom</b> | <b>Phylum</b> | <b>Class</b> | <b>Order</b> | <b>Family</b> | <b>Genus</b> |
|---------------------------|----------------|---------------|--------------|--------------|---------------|--------------|
| % Bacterial OTUs Assigned | 100            | 99.86         | 98.83        | 97.36        | 94.13         | 78.27        |
| % Fungal OTUs Assigned    | 100            | 68.24         | 63.34        | 60.79        | 53.34         | 46.28        |

**Table S1.** Percent of total OTUs assigned to each taxonomic level for the rarefied dataset

| Species             | Group   | OTU      | Taxonomy                         | Indicator value | Adjusted <i>p</i> -value |
|---------------------|---------|----------|----------------------------------|-----------------|--------------------------|
| <i>T. cristatus</i> | Captive | Otu00370 | <i>Basidiobolus ranarum</i>      | 1.0             | 0.03                     |
| <i>T. cristatus</i> | Captive | Otu00023 | Unclassified                     | 0.98            | 0.03                     |
| <i>T. cristatus</i> | Captive | Otu00009 | <i>Debaryomyces</i> sp.          | 0.98            | 0.04                     |
| <i>T. cristatus</i> | Captive | Otu00001 | <i>Debaryomyces hansenii</i> sp. | 0.96            | 0.04                     |
| <i>T. cristatus</i> | Captive | Otu00578 | Unclassified                     | 0.84            | 0.04                     |
| <i>T. cristatus</i> | Wild    | Otu00011 | <i>Cladosporium allicinum</i>    | 0.95            | 0.04                     |
| <i>T. cristatus</i> | Wild    | Otu00164 | <i>Cladosporium</i> sp.          | 0.91            | 0.04                     |

**Table S2.** Fungal indicator OTUs for *T. cristatus* for wild and captivity.

| Species                            | Day 1              | Day 7              | Day 15               | Day 21              | Day 28               | Day 35               | Day 42               | Day 49              | Day 56               |
|------------------------------------|--------------------|--------------------|----------------------|---------------------|----------------------|----------------------|----------------------|---------------------|----------------------|
| <i>L. vulgaris</i> prevalence (%)  | 0.0<br>(0.0, 30.8) | 0.0<br>(0.0, 30.8) | 10.0<br>(0.25, 44.5) | 20.0<br>(2.5, 55.6) | 30.0<br>(6.7, 65.2)  | 22.2<br>(2.8, 60.0)  | 11.1<br>(0.28, 48.2) | 0.0<br>(0.0, 33.6)  | 0.0<br>(0.0, 33.6)   |
| <i>L. vulgaris</i> lesions (%)     | 0.0                | 0.0                | 10.0                 | 30.0                | 30.0                 | 22.2                 | 22.2                 | 22.2                | 0.0                  |
| <i>T. cristatus</i> prevalence (%) | 0.0<br>(0.0, 30.8) | 0.0<br>(0.0, 30.8) | 30.0<br>(6.7, 65.2)  | 40<br>(12.2, 73.8)  | 60.0<br>(26.2, 87.8) | 60.0<br>(26.2, 87.8) | 50.0<br>(15.7, 84.3) | 42.9<br>(9.9, 81.6) | 28.6<br>(3.66, 71.0) |
| <i>T. cristatus</i> lesions (%)    | 0.0                | 0.0                | 0.0                  | 0.0                 | 0.0                  | 20.0                 | 12.5                 | 14.3                | 14.3                 |

**Table S3.** Mean *Bsal* prevalence (95% CI) and proportion of animals with lesions (%) for *Lissotriton vulgaris* and *Triturus cristatus*

---

| Variable                 | Co-efficient | HR (95% CI)                | p-value |
|--------------------------|--------------|----------------------------|---------|
| Species                  | 2.74         | 15.540 (3.96e-5 - 6.10e+6) | 0.68    |
| Infection intensity (GE) | 0.06         | 1.067 (1.01 - 1.13)        | 0.02    |
| Start weight             | 0.32         | 1.371 (0.52 - 3.63)        | 0.53    |

**Table S4.** Results of survival analysis

**Whole model  $r^2 = 0.516$   $p = 0.02$**

---

| <b>Species</b>      | <b>Group</b>                | <b>OTU</b> | <b>Taxonomy</b>         | <b>Indicator value</b> | <b>Adjusted <i>p</i>-value</b> |
|---------------------|-----------------------------|------------|-------------------------|------------------------|--------------------------------|
| <i>L. vulgaris</i>  | Day 28 Control              | OTU012     | Bacteroidetes           | 0.98                   | 0.009                          |
| <i>L. vulgaris</i>  | Day 28 Control              | OTU041     | Rhodobacteraceae        | 0.73                   | 0.04                           |
| <i>L. vulgaris</i>  | Day 28 <i>Bsal</i> Positive | OTU019     | <i>Chryseobacterium</i> | 0.96                   | 0.03                           |
| <i>L. vulgaris</i>  | Day 28 <i>Bsal</i> Positive | OTU016     | <i>Stenotrophomonas</i> | 0.92                   | 0.009                          |
| <i>T. cristatus</i> | Day 28 <i>Bsal</i> Positive | OTU016     | <i>Stenotrophomonas</i> | 0.88                   | 0.04                           |
| <i>L. vulgaris</i>  | Day 56 <i>Bsal</i> Negative | OTU019     | <i>Chryseobacterium</i> | 0.93                   | 0.04                           |

**Table S5.** Bacterial indicator OTUs at day 28 based on *Bsal* infection for *L. vulgaris* and *T. cristatus*.

## 2.2 Figures

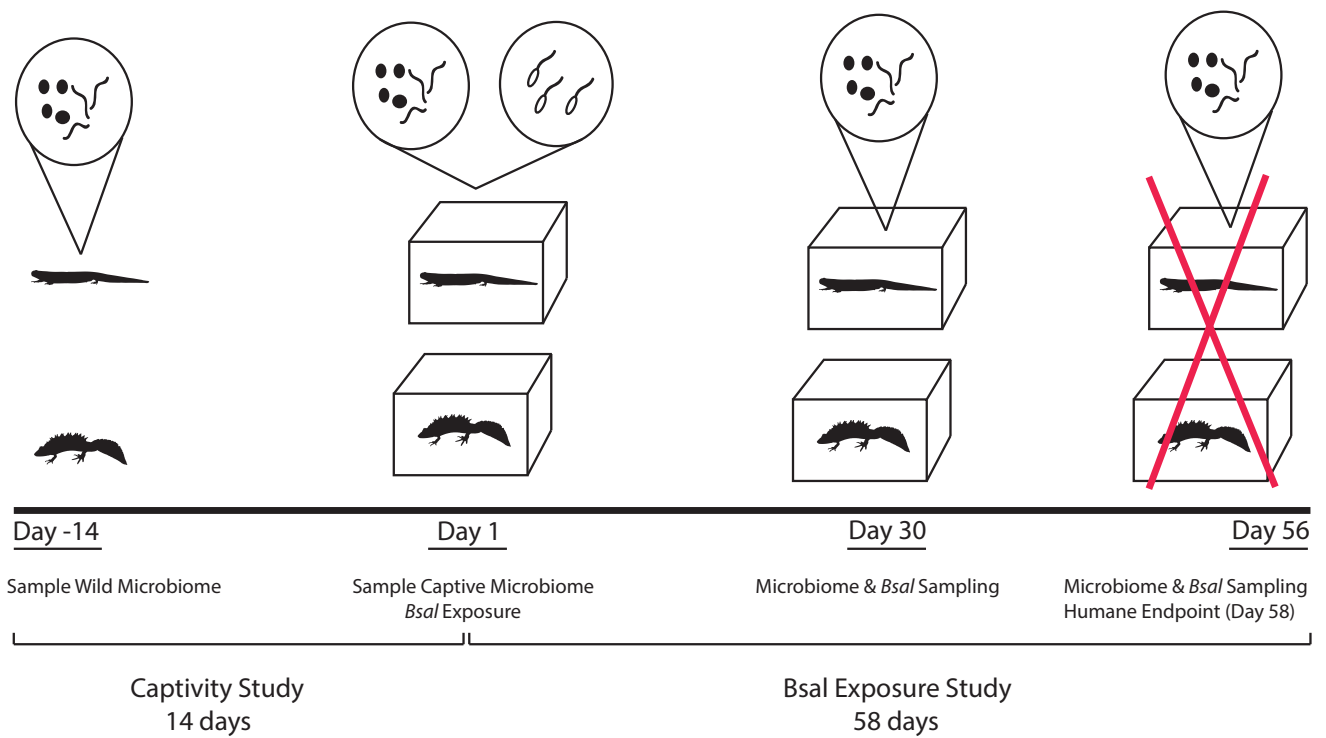

**Figure S1.** Overview of design for captivity study and *Bsal* exposure experiment.

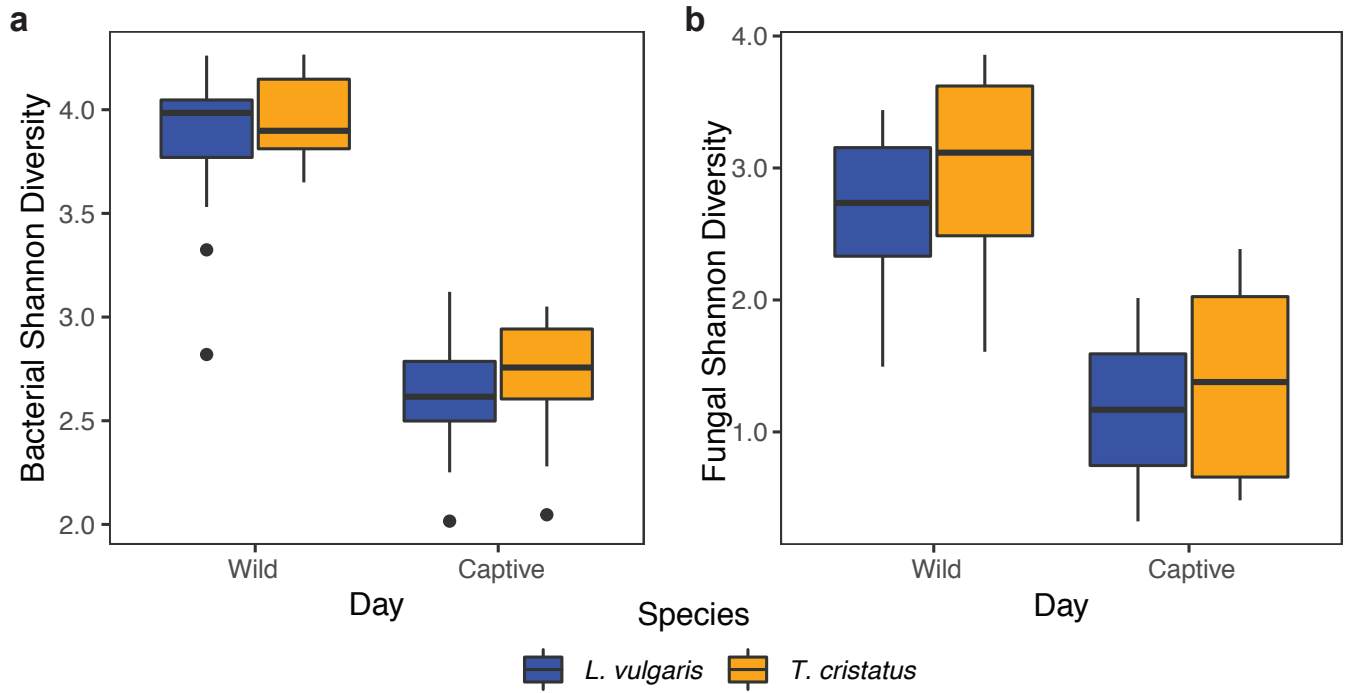

**Figure S2.** Skin Shannon diversity for (A) bacteria and (B) fungi in wild and captive *L. vulgaris* and *T. cristatus*.



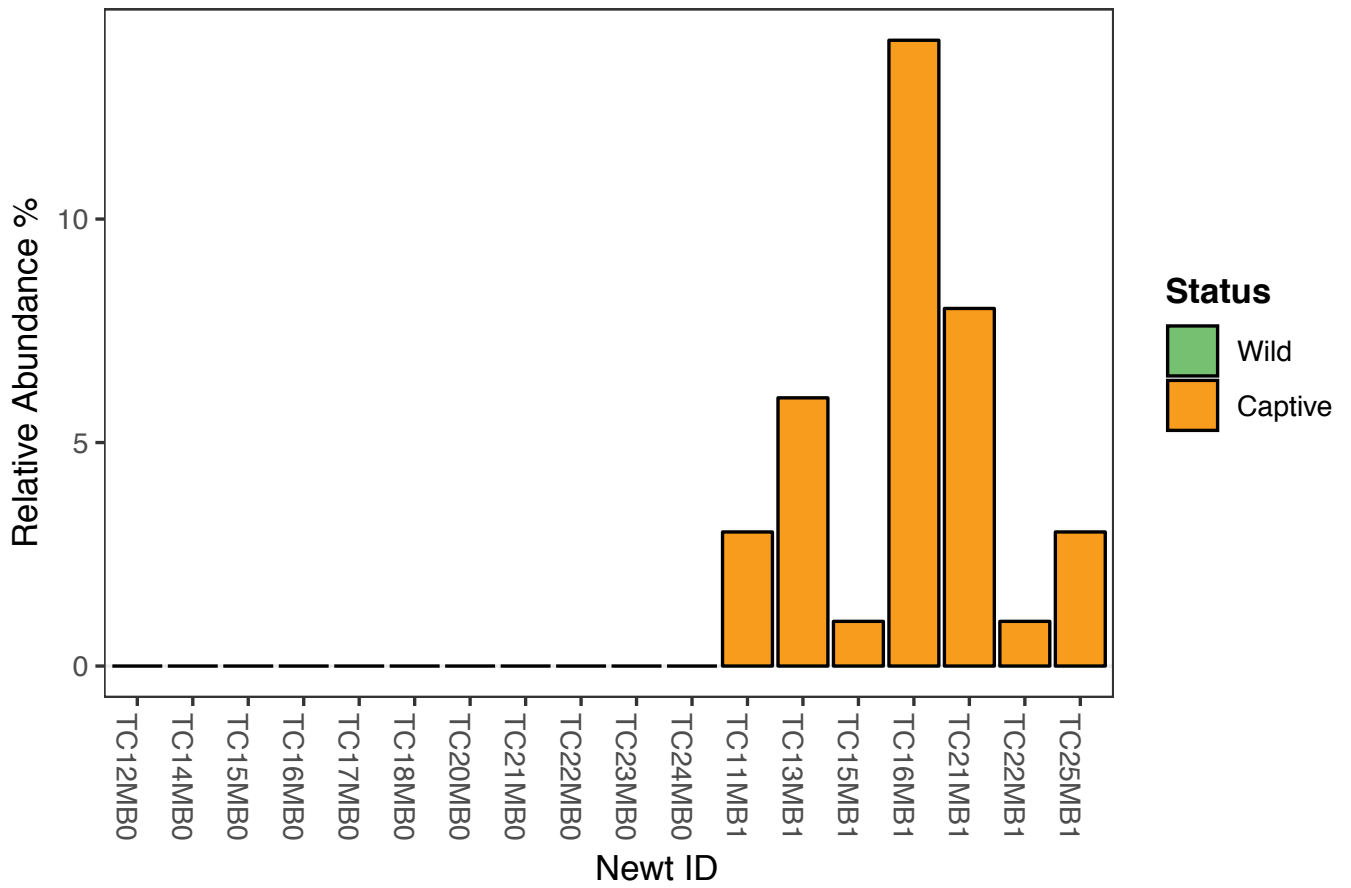

**Figure S3.** Plot of relative abundance of *Basidiobolus ranarum* on *T. cristatus* in the wild versus captivity.

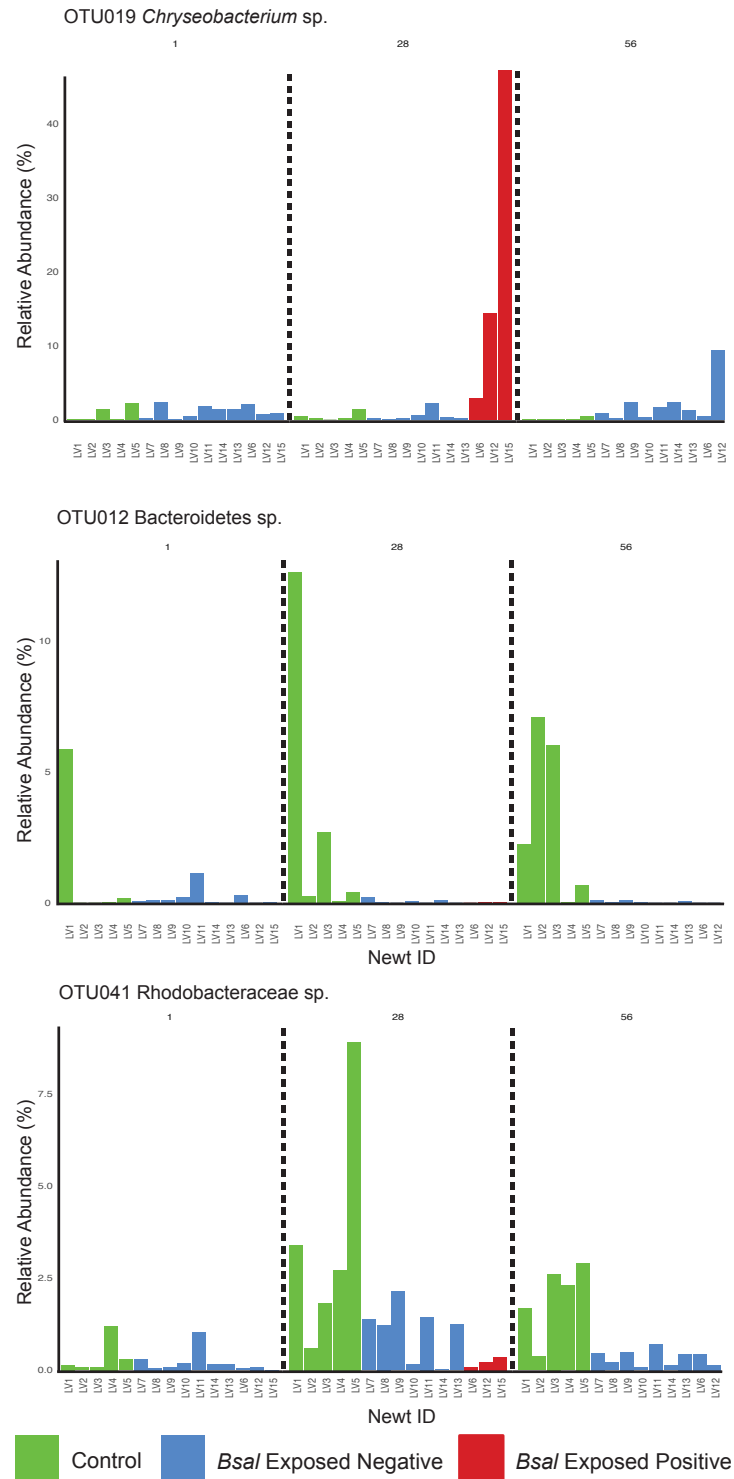

**Figure S4.** Plots of *L. vulgaris* indicator taxa relative abundance at days 1, 28 and 56 of the *Bsal* exposure experiment.
